# Supplementary material
Source: PubMed Central journal article supplement (PMC3179387)
Supplement: NIHMS307342-supplement-01.pdf [file NIHMS307342-supplement-01.pdf]

# Measurement of Adults' Sedentary Time in Population-Based Studies

Genevieve N. Healy, PhD, Bronwyn K. Clark, MPH, Elisabeth A.H. Winkler, PhD, Paul A. Gardiner, BSc,  
Wendy J. Brown, PhD, Charles E. Matthews, PhD

## Appendix A

### Sedentary time by age and race/ethnicity among U.S. women aged ≥20 years (NHANES 2003–2006)

|                                                                                 | Non-Hispanic white    |                                | Mexican-American      |                                | Non-Hispanic black    |                                |
|---------------------------------------------------------------------------------|-----------------------|--------------------------------|-----------------------|--------------------------------|-----------------------|--------------------------------|
|                                                                                 | <i>n</i> <sup>a</sup> | Estimate (95% CI) <sup>b</sup> | <i>n</i> <sup>a</sup> | Estimate (95% CI) <sup>a</sup> | <i>n</i> <sup>a</sup> | Estimate (95% CI) <sup>a</sup> |
| <b>Accelerometer-derived sedentary time, by age in years (hours per day, M)</b> |                       |                                |                       |                                |                       |                                |
| 20–29                                                                           | 237                   | 8.3 (8.1, 8.5)                 | 133                   | 8.3 (8.0, 8.5)                 | 80                    | 8.5 (8.3, 8.7)                 |
| 30–39                                                                           | 237                   | 8.0 (7.8, 8.3)                 | 122                   | 7.6 (7.4, 7.9)                 | 95                    | 8.2 (7.9, 8.4)                 |
| 40–49                                                                           | 237                   | 8.2 (8.0, 8.4)                 | 106                   | 7.7 (7.3, 8.1)                 | 144                   | 8.2 (7.9, 8.5)                 |
| 50–59                                                                           | 261                   | 8.5 (8.3, 8.7)                 | 59                    | 7.9 (7.5, 8.2)                 | 102                   | 8.5 (8.2, 8.7)                 |
| 60–69                                                                           | 264                   | 8.8 (8.7, 9.1)                 | 135                   | 8.4 (8.0, 8.8)                 | 116                   | 9.2 (9.0, 9.4)                 |
| ≥70                                                                             | 445                   | 9.8 (9.7, 10.0)                | 86                    | 9.7 (9.2, 10.2)                | 76                    | 10.2 (9.7, 10.6)               |
| <b>Sit most of the day, by age in years (%)</b>                                 |                       |                                |                       |                                |                       |                                |
| 20–29                                                                           | 489                   | 22.7 (17.9, 27.6)              | 284                   | 17.7 (12.2, 23.3)              | 241                   | 22.1 (15.4, 28.9)              |
| 30–39                                                                           | 426                   | 24.1 (19.9, 28.2)              | 194                   | 17.0 (11.1, 23.0)              | 187                   | 23.0 (16.7, 29.3)              |
| 40–49                                                                           | 362                   | 30.2 (26.8, 33.5)              | 166                   | 20.3 (13.2, 27.5)              | 222                   | 29.4 (23.6, 35.2)              |
| 50–59                                                                           | 348                   | 25.8 (21.6, 30.0)              | 83                    | 17.2 (9.1, 25.2)               | 149                   | 37.6 (31.1, 44.0)              |
| 60–69                                                                           | 348                   | 25.1 (19.8, 30.4)              | 177                   | 24.2 (17.9, 30.5)              | 168                   | 37.1 (28.9, 45.3)              |
| ≥70                                                                             | 711                   | 31.8 (26.8, 36.7)              | 129                   | 40.2 (30.3, 50.0)              | 131                   | 52.7 (41.3, 64.1)              |
| <b>≥3 hours per day screen time, by age in years (%)</b>                        |                       |                                |                       |                                |                       |                                |
| 20–29                                                                           | 489                   | 46.0 (41.1, 50.9)              | 284                   | 49.4 (44.1, 54.7)              | 241                   | 71.1 (63.2, 79.0)              |
| 30–39                                                                           | 426                   | 32.5 (31.5, 41.0)              | 194                   | 35.0 (28.6, 41.4)              | 187                   | 56.3 (46.1, 66.6)              |
| 40–49                                                                           | 363                   | 42.5 (37.7, 47.3)              | 166                   | 37.3 (27.6, 47.0)              | 222                   | 61.2 (54.8, 67.6)              |

|                                                      | Non-Hispanic white    |                                | Mexican-American      |                                | Non-Hispanic black    |                                |
|------------------------------------------------------|-----------------------|--------------------------------|-----------------------|--------------------------------|-----------------------|--------------------------------|
|                                                      | <i>n</i> <sup>a</sup> | Estimate (95% CI) <sup>b</sup> | <i>n</i> <sup>a</sup> | Estimate (95% CI) <sup>a</sup> | <i>n</i> <sup>a</sup> | Estimate (95% CI) <sup>a</sup> |
| 50-59                                                | 348                   | 47.2 (40.6, 53.8)              | 83                    | 27.8 (18.1, 37.4)              | 149                   | 66.2 (58.4, 74.1)              |
| 60-69                                                | 347                   | 58.2 (52.6, 63.8)              | 177                   | 45.7 (38.0, 53.4)              | 168                   | 66.2 (54.1, 78.4)              |
| ≥70                                                  | 709                   | 60.4 (57.1, 63.7)              | 129                   | 49.1 (40.5, 57.7)              | 131                   | 62.6 (54.2, 71.1)              |
| <b>≥2 hours per day TV, by age in years (%)</b>      |                       |                                |                       |                                |                       |                                |
| 20-29                                                | 489                   | 56.9 (51.5, 62.4)              | 284                   | 66.9 (60.8, 72.9)              | 241                   | 77.9 (71.0, 84.8)              |
| 30-39                                                | 426                   | 51.9 (47.0, 56.8)              | 194                   | 63.3 (54.8, 71.9)              | 187                   | 70.8 (62.4, 79.2)              |
| 40-49                                                | 363                   | 57.6 (51.8, 63.5)              | 166                   | 61.3 (53.6, 69.0)              | 222                   | 73.7 (69.2, 78.1)              |
| 50-59                                                | 348                   | 62.8 (56.8, 68.9)              | 83                    | 56.1 (45.9, 66.4)              | 149                   | 75.9 (67.1, 84.7)              |
| 60-69                                                | 347                   | 77.0 (71.5, 82.6)              | 177                   | 68.2 (59.7, 76.7)              | 168                   | 81.9 (74.7, 89.0)              |
| ≥70                                                  | 709                   | 81.4 (77.7, 85.2)              | 129                   | 70.8 (61.7, 79.9)              | 131                   | 79.9 (74.2, 85.7)              |
| <b>≥1 hour per day computer, by age in years (%)</b> |                       |                                |                       |                                |                       |                                |
| 20-29                                                | 489                   | 34.0 (29.5, 38.6)              | 284                   | 20.7 (14.0, 27.5)              | 241                   | 43.4 (37.6, 49.3)              |
| 30-39                                                | 426                   | 31.9 (25.9, 38.0)              | 194                   | 12.0 (5.7, 18.3)               | 187                   | 33.5 (25.9, 41.0)              |
| 40-49                                                | 363                   | 32.3 (26.8, 38.0)              | 166                   | 14.9 (9.9, 19.9)               | 222                   | 24.8 (18.8, 30.7)              |
| 50-59                                                | 348                   | 30.8 (26.2, 35.4)              | 83                    | 6.3 (0.4, 12.3) <sup>c</sup>   | 149                   | 30.3 (22.4, 38.2)              |
| 60-69                                                | 347                   | 30.7 (24.6, 36.8)              | 177                   | 5.8 (2.6, 8.9)                 | 168                   | 17.9 (11.9, 23.9)              |
| ≥70                                                  | 709                   | 13.3 (10.0, 16.5)              | 129                   | 0.9 (-1.0, 2.8) <sup>c</sup>   | 131                   | 4.1 (0.9, 7.2)                 |

Note: Numbers in bold and italics are <71, the minimum estimated as needed for reliable prevalence estimates of outcomes of overall prevalence between 25% and 75%, based on a design effect 2.3597 (calculated for the accelerometer-derived sedentary time outcome)\*30.

<sup>a</sup>Number of participants with data, or with 4 or more days of valid (>10 hours observed) data for accelerometer-derived sedentary time

<sup>b</sup>Estimate of adjusted mean (accelerometer-derived sedentary time) or prevalence, with 95% CI; derived from marginal means in linear regression or marginal probabilities in logistic regression, with linearized variance estimation and weighted to the U.S. population

<sup>c</sup>Coefficient of variation ≥0.3 and estimate is not statistically reliable

NHANES, National Health and Nutrition Examination Survey

## Appendix B

### Sedentary time by age and race/ethnicity among U.S. men aged ≥20 years (NHANES 2003–2006)

|                                                                                  | Non-Hispanic white    |                                | Mexican-American      |                                | Non-Hispanic black    |                                |
|----------------------------------------------------------------------------------|-----------------------|--------------------------------|-----------------------|--------------------------------|-----------------------|--------------------------------|
|                                                                                  | <i>n</i> <sup>a</sup> | Estimate (95% CI) <sup>b</sup> | <i>n</i> <sup>a</sup> | Estimate (95% CI) <sup>a</sup> | <i>n</i> <sup>a</sup> | Estimate (95% CI) <sup>a</sup> |
| <b>Accelerometer-measured sedentary time, by age in years (hours per day, M)</b> |                       |                                |                       |                                |                       |                                |
| 20–29                                                                            | 188                   | 8.1 (7.8, 8.4)                 | 112                   | 6.5 (6.1, 6.8)                 | 83                    | 8.1 (7.7, 8.4)                 |
| 30–39                                                                            | 215                   | 7.9 (7.5, 8.2)                 | 111                   | 6.9 (6.6, 7.3)                 | 96                    | 7.8 (7.3, 8.2)                 |
| 40–49                                                                            | 251                   | 8.0 (7.8, 8.2)                 | 139                   | 7.3 (7.0, 7.5)                 | 116                   | 7.9 (7.5, 8.3)                 |
| 50–59                                                                            | 263                   | 8.4 (8.2, 8.7)                 | 58                    | 7.3 (6.9, 7.6)                 | 87                    | 8.1 (7.7, 8.4)                 |
| 60–69                                                                            | 253                   | 9.1 (8.9, 9.3)                 | 130                   | 8.7 (8.3, 9.1)                 | 109                   | 9.1 (8.7, 9.4)                 |
| ≥70                                                                              | 488                   | 10.2 (10.1, 10.3)              | 93                    | 9.5 (9.1, 9.9)                 | 86                    | 10.2 (9.9, 10.5)               |
| <b>Sit most of the day, by age in years (%)</b>                                  |                       |                                |                       |                                |                       |                                |
| 20–29                                                                            | 356                   | 18.7 (13.9, 23.5)              | 223                   | 5.0 (1.4, 8.7) <sup>c</sup>    | 211                   | 12.5 (8.4, 16.5)               |
| 30–39                                                                            | 349                   | 23.1 (18.6, 27.6)              | 171                   | 9.1 (3.2, 14.9)                | 181                   | 21.7 (15.9, 27.5)              |
| 40–49                                                                            | 382                   | 19.9 (15.6, 24.2)              | 175                   | 14.8 (9.4, 20.1)               | 190                   | 16.9 (10.5, 23.4)              |
| 50–59                                                                            | 356                   | 25.4 (20.3, 30.5)              | 81                    | 19.5 (12.6, 26.5)              | 143                   | 29.8 (23.2, 36.5)              |
| 60–69                                                                            | 340                   | 23.2 (19.2, 27.1)              | 179                   | 18.8 (11.2, 26.4)              | 170                   | 34.9 (27.8, 41.9)              |
| ≥70                                                                              | 711                   | 29.5 (25.7, 33.4)              | 125                   | 22.2 (15.6, 28.9)              | 122                   | 34.7 (24.4, 45.0)              |
| <b>≥3 hours per day screen time, by age in years (%)</b>                         |                       |                                |                       |                                |                       |                                |
| 20–29                                                                            | 356                   | 53.5 (47.8, 59.1)              | 223                   | 43.4 (38.1, 48.7)              | 211                   | 66.3 (59.4, 73.2)              |
| 30–39                                                                            | 349                   | 45.5 (38.6, 52.4)              | 171                   | 35.6 (27.6, 43.5)              | 181                   | 63.2 (55.5, 70.8)              |
| 40–49                                                                            | 383                   | 45.0 (38.4, 51.6)              | 175                   | 29.2 (22.2, 36.2)              | 190                   | 56.5 (48.5, 64.4)              |
| 50–59                                                                            | 356                   | 51.6 (46.1, 57.1)              | 81                    | 36.7 (27.4, 46.1)              | 144                   | 60.7 (51.4, 69.9)              |
| 60–69                                                                            | 341                   | 62.9 (57.0, 68.9)              | 179                   | 42.7 (34.6, 50.8)              | 169                   | 65.5 (58.3, 72.7)              |
| ≥70                                                                              | 712                   | 62.8 (58.5, 67.1)              | 126                   | 53.0 (41.1, 64.9)              | 122                   | 64.3 (55.2, 73.4)              |
| <b>≥2 hours per day TV, by age in years (%)</b>                                  |                       |                                |                       |                                |                       |                                |
| 20–29                                                                            | 356                   | 64.1 (58.0, 70.1)              | 223                   | 67.9 (63.1, 72.7)              | 211                   | 76.3 (69.1, 83.4)              |
| 30–39                                                                            | 349                   | 61.6 (55.6, 67.7)              | 171                   | 60.9 (53.3, 68.5)              | 181                   | 73.2 (66.6, 79.7)              |
| 40–49                                                                            | 383                   | 63.5 (59.1, 67.8)              | 175                   | 56.1 (48.5, 63.8)              | 190                   | 72.1 (62.6, 81.7)              |
| 50–59                                                                            | 356                   | 66.2 (62.4, 70.0)              | 81                    | 67.8 (57.5, 78.1)              | 144                   | 76.6 (70.0, 83.3)              |
| 60–69                                                                            | 341                   | 78.7 (74.9, 82.6)              | 179                   | 68.0 (56.4, 79.6)              | 169                   | 83.6 (77.6, 89.6)              |
| ≥70                                                                              | 712                   | 82.3 (78.6, 86.0)              | 126                   | 72.6 (63.9, 81.3)              | 122                   | 86.8 (80.9, 92.6)              |

|                                                           | Non-Hispanic white    |                                | Mexican-American      |                                | Non-Hispanic black    |                                |
|-----------------------------------------------------------|-----------------------|--------------------------------|-----------------------|--------------------------------|-----------------------|--------------------------------|
|                                                           | <i>n</i> <sup>a</sup> | Estimate (95% CI) <sup>b</sup> | <i>n</i> <sup>a</sup> | Estimate (95% CI) <sup>a</sup> | <i>n</i> <sup>a</sup> | Estimate (95% CI) <sup>a</sup> |
| <b>≥1 hour per day computer time, by age in years (%)</b> |                       |                                |                       |                                |                       |                                |
| 20-29                                                     | 356                   | 45.9 (40.1, 51.6)              | 223                   | 16.4 (12.6, 20.1)              | 211                   | 45.7 (37.2, 54.2)              |
| 30-39                                                     | 349                   | 40.4 (33.6, 47.1)              | 171                   | 15.4 (9.3, 21.4)               | 181                   | 41.4 (33.1, 49.8)              |
| 40-49                                                     | 383                   | 34.1 (28.6, 39.7)              | 175                   | 11.2 (6.4, 16.0)               | 190                   | 29.7 (22.2, 37.2)              |
| 50-59                                                     | 356                   | 27.7 (21.1, 34.3)              | 81                    | 10.1 (3.1, 17.1) <sup>c</sup>  | 144                   | 23.1 (15.6, 30.6)              |
| 60-69                                                     | 341                   | 27.7 (22.6, 32.9)              | 179                   | 9.0 (3.4, 14.6) <sup>c</sup>   | 169                   | 16.2 (10.8, 21.5)              |
| ≥70                                                       | 712                   | 19.2 (15.2, 23.2)              | 126                   | 5.2 (-0.3, 10.7)               | 122                   | 2.9 (-0.3, 6.0) <sup>c</sup>   |

*Note:* Numbers in bold and italics are <71, the minimum estimated as needed for reliable prevalence estimates of outcomes of overall prevalence between 25% and 75%, based on a design effect 2.3597 (calculated for the accelerometer-derived sedentary time outcome)\*30.

<sup>a</sup>Number of participants with data, or with 4 or more days of valid (>10 hours observed) data for accelerometer-derived sedentary time

<sup>b</sup>Estimate of adjusted mean (accelerometer-derived sedentary time) or prevalence, with 95% CI; derived from marginal means in linear regression or marginal probabilities in logistic regression, with linearized variance estimation and weighted to the U.S. population

<sup>c</sup>Coefficient of variation ≥0.3 and estimate is not statistically reliable

NHANES, National Health and Nutrition Examination Survey
